# Supplementary figures and images for: The Early Cambrian Mianyang-Changning Intracratonic Sag and Its Control on Petroleum Accumulation in the Sichuan Basin, China
Source: Hindawi journal article supplement (doi:10.1155/2017/6740892), 2017-01-01

A 0 5 km

SSE A'

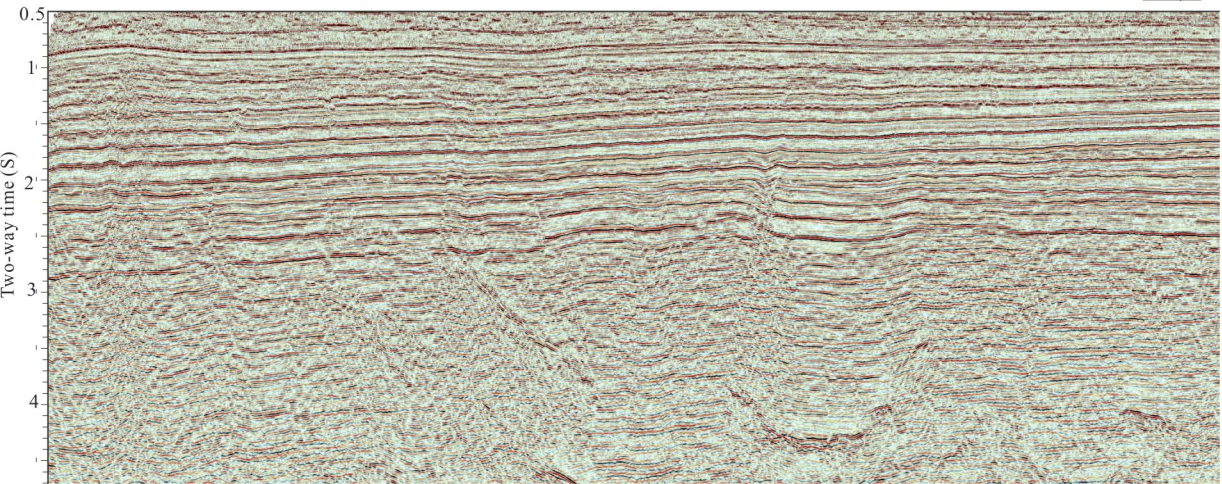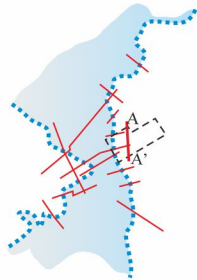

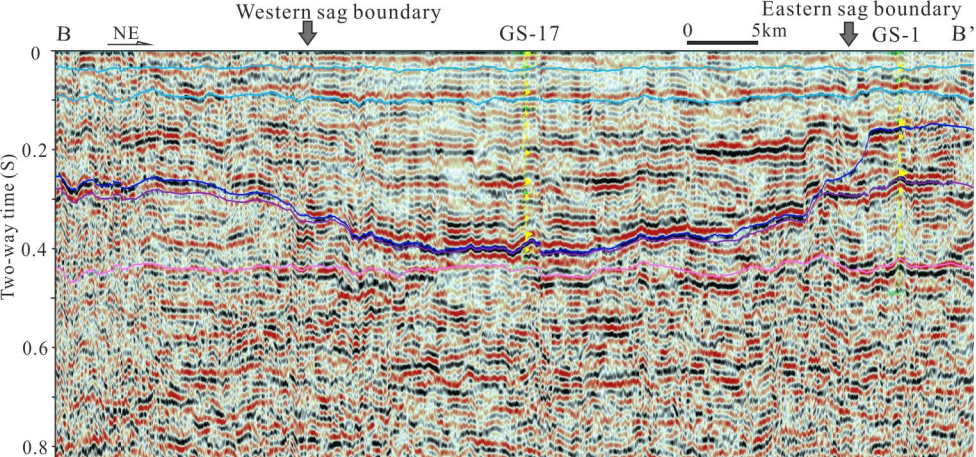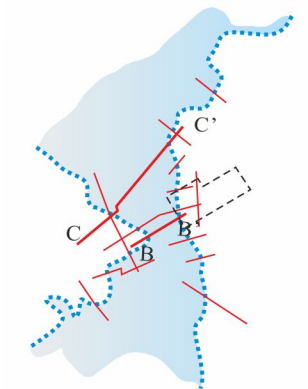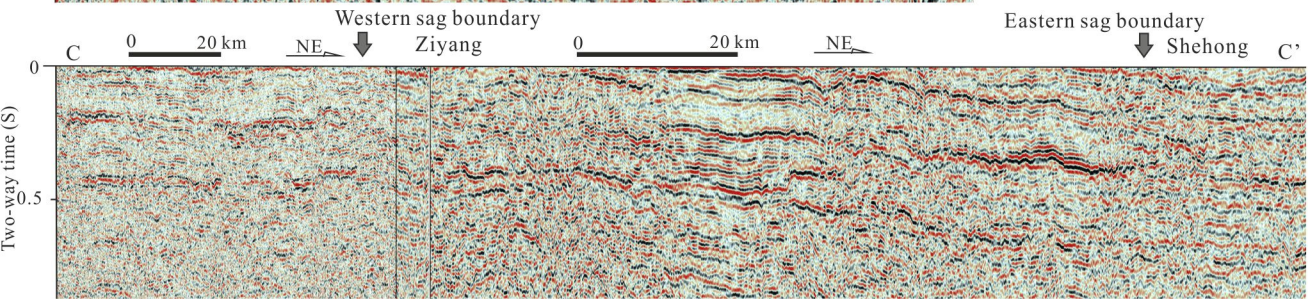

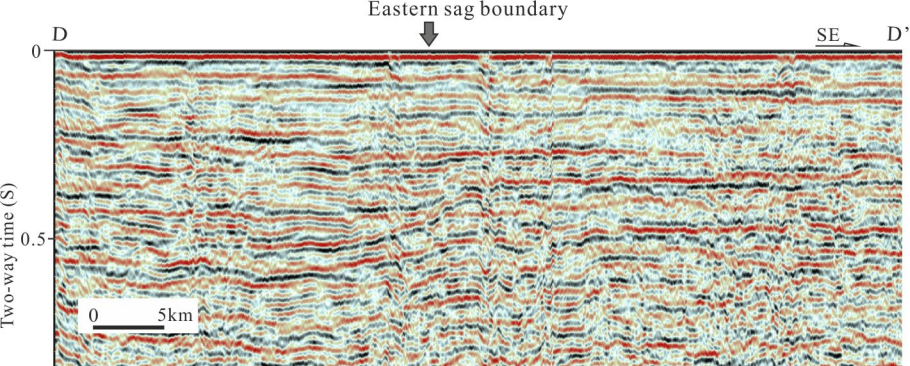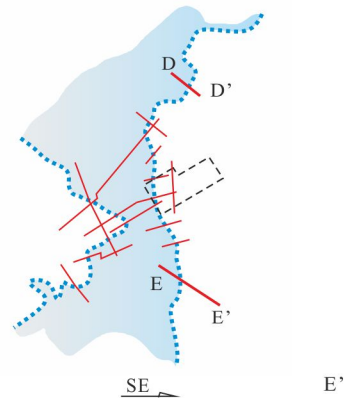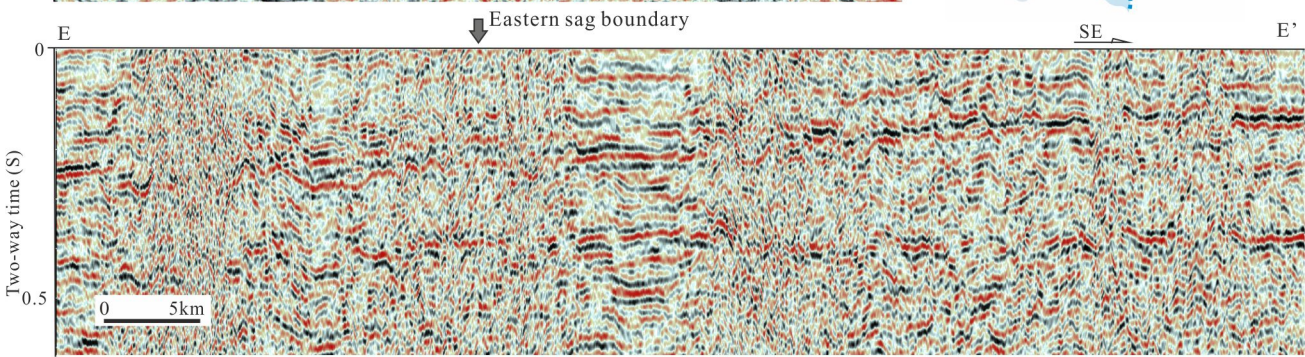

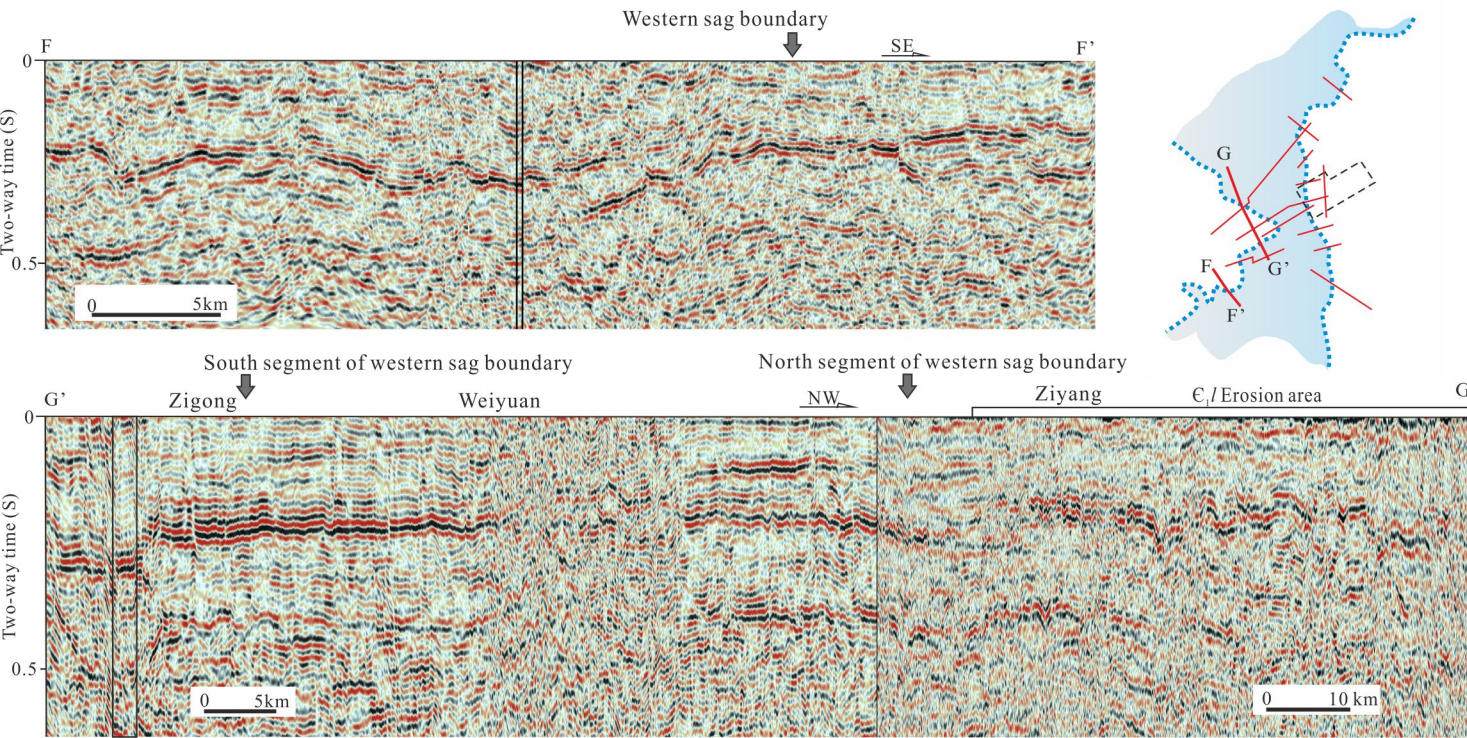

Supplement: f1 [file 6740892.f1.pdf]
